# Supplementary material for: Dynamic effects of irrigation on photosynthesis and yield-related physiological characteristics in different glutinous wheat cultivars
Source: PeerJ. 2025 Oct 24;13:e20230. doi: 10.7717/peerj.20230 (PMC12558156; doi:10.7717/peerj.20230)
Supplement: Supplemental Information 1 [file peerj-13-20230-s001.xlsx]

## Sheet: experiment design
Treatment	Irrigation amount during each growth stage (m3·hm−2)			Number of irrigations	Total irrigation amount (m3·hm−2)
	Wintering	Jointing	Flowering
W0 (rainfed)	-	-	-	0	0
W1 (water-saving irrigation)	-	750	-	1	750
W2 (conventional irrigation)	750	750	750	3	2250
