# Supplementary material for: Dynamic effects of irrigation on photosynthesis and yield-related physiological characteristics in different glutinous wheat cultivars
Source: PeerJ. 2025 Oct 24;13:e20230. doi: 10.7717/peerj.20230 (PMC12558156; doi:10.7717/peerj.20230)
Supplement: Supplemental Information 2 [file peerj-13-20230-s002.xlsx]

## Sheet: yield
	variety	water treat	NO. of ears(m-2)	Grains per spike	1000-grain-weight(g)	yield(kg hm-2）
	SM19	W0	624.3	27.28	44.9193	8680.95
			639.9	27.96	45.4293	8792.95
		W1	642.3	31.68	46.0694	9653.21
			657.9	32.36	46.5794	9765.21
		W2	631.2	31.14	44.0092	9410.15
			646.8	31.82	44.5192	9522.15
	SM19-P	W0	578.25	27.93	46.7788	8576.77
			593.85	28.61	47.2888	8688.77
		W1	616.2	32.04	44.8795	9132.36
			631.8	32.72	45.3895	9244.36
		W2	654.3	31.29	45.6015	9861.55
			669.9	31.97	46.1115	9973.55
	SM19-N	W0	616.2	29.76	43.8645	9184.44
			631.8	30.52	44.3745	9296.44
		W1	627.3	31.25	41.9689	9757.38
			642.9	31.93	42.4789	9869.38
		W2	672.3	31.88	40.6847	10330.3
			687.9	32.56	41.1947	10442.3
