# Supplementary material for: Dynamic effects of irrigation on photosynthesis and yield-related physiological characteristics in different glutinous wheat cultivars
Source: PeerJ. 2025 Oct 24;13:e20230. doi: 10.7717/peerj.20230 (PMC12558156; doi:10.7717/peerj.20230)
Supplement: Supplemental Information 3 [file peerj-13-20230-s003.xlsx]

## Sheet: 5.2
			Pn		Gs		Tr
SM19-N	0		①	②	①	②	①	②
		Replicate value 1	17.8	25.2	0.623	0.515	5.22	7.59
		Replicate value 2	15.7	23	0.576	0.447	5.07	7.58
		Replicate value 3	17.6	17.7	0.341	0.501	5.12	7.95
		mean of replicates	17.0333	21.9667	0.513333	0.487667	5.13667	7.70667
		Mean value	19.5		0.5005		6.42167
	1		①	②	①	②	①	②
		Replicate value 1	22.3	18.6	0.482	0.553	6.83	6.97
		Replicate value 2	23.1	19.3	0.601	0.525	6.64	6.53
		Replicate value 3	18.9	18.5	0.51	0.426	5.09	6.53
		mean of replicates	21.4333	18.8	0.531	0.501333	6.18667	6.67667
		Mean value	20.1167		0.516167		6.43167
	3		①	②	①	②	①	②
		Replicate value 1	19.5	21.4	0.57	0.576	5.11	7.82
		Replicate value 2	20.1	21.7	0.507	0.575	6.01	7.37
		Replicate value 3	19.6	21.1	0.512	0.599	5.62	6.81
		mean of replicates	19.7333	21.4	0.529667	0.583333	5.58	7.33333
		Mean value	20.5667		0.5565		6.45667
SM19-P	0		①	②	①	②	①	②
		Replicate value 1	21.5	20.3	0.51	0.271	5.46	5.81
		Replicate value 2	17.5	21.8	0.42	0.458	5.39	5.87
		Replicate value 3	17.6	20.1	0.451	0.278	5.59	5.04
		mean of replicates	18.8667	20.7333	0.460333	0.335667	5.48	5.57333
		Mean value	19.8		0.398		5.52667
	1		①	②	①	②	①	②
		Replicate value 1	21.97	22.9	0.48	0.487	5.22	6.77
		Replicate value 2	22.87	21.96	0.557	0.47	5.86	6.53
		Replicate value 3	23.81	22.84	0.529	0.465	5.62	6.66
		mean of replicates	22.8833	22.5667	0.522	0.474	5.56667	6.65333
		Mean value	22.725		0.498		6.11
	3		①	②	①	②	①	②
		Replicate value 1	23.6	24.4	0.453	0.453	6.62	7.4
		Replicate value 2	29	20.2	0.437	0.524	6.66	6.56
		Replicate value 3	23.1	18.6	0.486	0.606	6.67	7.1
		mean of replicates	25.2333	21.0667	0.458667	0.527667	6.65	7.02
		Mean value	23.15		0.493167		6.835
SM19	0		①	②	①	②	①	②
		Replicate value 1	23.3	16.2	0.466	0.536	6	7.26
		Replicate value 2	20.7	19.4	0.452	0.436	5.6	6.96
		Replicate value 3	21.8	17.4	0.317	0.568	6.05	6.44
		mean of replicates	21.9333	17.6667	0.411667	0.513333	5.88333	6.88667
		Mean value	19.8		0.4625		6.385
	1		①	②	①	②	①	②
		Replicate value 1	21.6	22.5	0.587	0.478	6.46	6.99
		Replicate value 2	24.3	20.1	0.558	0.477	6.64	6.09
		Replicate value 3	22.5	22.2	0.63	0.522	5.43	7.21
		mean of replicates	22.8	21.6	0.591667	0.492333	6.17667	6.76333
		Mean value	22.2		0.542		6.47
			①	②	①	②	①	②
	3		①	②	①	②	①	②
		Replicate value 1	12	24.4	0.518	0.55	7.99	4.36
		Replicate value 2	15.3	24.4	0.472	0.508	8.06	4.73
		Replicate value 3	20.3	21.6	0.504	0.424	8.37	4.65
		mean of replicates	15.8667	23.4667	0.498	0.494	8.14	4.58
		Mean value	19.6667		0.496		6.36

## Sheet: 5.10
			Pn		Gs		Tr
SM19-N	0		①	②	①	②	①	②
		Replicate value 1	17.3	23.3	0.505	0.527	5.51	8.57
		Replicate value 2	14.4	25.2	0.621	0.473	5.34	9.39
		Replicate value 3	17.5	25.7	0.627	0.487	5.17	9.32
		mean of replicates	16.4	24.7333	0.584333	0.495667	5.34	9.09333
		Mean value	20.5667		0.54		7.21667
	1		①	②	①	②	①	②
		Replicate value 1	18.5	27.3	0.639	0.556	7.21	7.31
		Replicate value 2	20.3	28.2	0.651	0.638	8.19	7.47
		Replicate value 3	21	30.9	0.51	0.624	8.26	6.99
		mean of replicates	19.9333	28.8	0.6	0.606	7.88667	7.25667
		Mean value	24.3667		0.603		7.57167
	3		①	②	①	②	①	②
		Replicate value 1	22.9	26.9	0.57	0.589	6.93	8.86
		Replicate value 2	23.4	26.4	0.608	0.601	6.92	8.67
		Replicate value 3	25.2	26.6	0.666	0.649	7.3	8.33
		mean of replicates	23.8333	26.6333	0.614667	0.613	7.05	8.62
		Mean value	25.2333		0.613833		7.835
SM19-P	0		①	②	①	②	①	②
		Replicate value 1	19.8	28.5	0.575	0.44	5.96	7.93
		Replicate value 2	17	27.4	0.541	0.34	5.92	8.23
		Replicate value 3	18	24.3	0.562	0.342	5.88	7.9
		mean of replicates	18.2667	26.7333	0.559333	0.374	5.92	8.02
		Mean value	22.5		0.466667		6.97
	1		①	②	①	②	①	②
		Replicate value 1	23	27.1	0.541	0.473	7.6	7.07
		Replicate value 2	23.1	26.3	0.565	0.54	7.52	6.05
		Replicate value 3	22.4	24.6	0.546	0.463	7.49	6.16
		mean of replicates	22.8333	26	0.550667	0.492	7.53667	6.42667
		Mean value	24.4167		0.521333		6.98167
	3		①	②	①	②	①	②
		Replicate value 1	25.3	24.2	0.496	0.554	6.94	8.22
		Replicate value 2	24.1	28	0.579	0.584	6.53	8.75
		Replicate value 3	23.2	27.1	0.603	0.405	6.35	7.34
		mean of replicates	24.2	26.4333	0.559333	0.514333	6.60667	8.10333
		Mean value	25.3167		0.536833		7.355
SM19	0		①	②	①	②	①	②
		Replicate value 1	22	23.5	0.575	0.469	7.05	7.53
		Replicate value 2	20.7	22.1	0.553	0.45	7.03	7.63
		Replicate value 3	21.8	20.4	0.556	0.458	7.38	7.47
		mean of replicates	21.5	22	0.561333	0.459	7.15333	7.54333
		Mean value	21.75		0.510167		7.34833
	1		①	②	①	②	①	②
		Replicate value 1	30.3	25.4	0.547	0.413	7.79	6.99
		Replicate value 2	26.6	24.5	0.615	0.498	7.66	7.52
		Replicate value 3	30.9	26.5	0.537	0.511	7.75	7.5
		mean of replicates	29.2667	25.4667	0.566333	0.474	7.73333	7.33667
		Mean value	27.3667		0.520167		7.535
	3		①	②	①	②	①	②
		Replicate value 1	24.3	30.2	0.479	0.532	3.97	8.42
		Replicate value 2	20.3	21.6	0.442	0.779	4.08	8.72
		Replicate value 3	19.9	26.2	0.42	0.481	4.08	8.16
		mean of replicates	21.5	26	0.447	0.597333	4.04333	8.43333
		Mean value	23.75		0.522167		6.23833

## Sheet: 5.17
			Pn		Gs		Tr
SM19-N	0		①	②	①	②	①	②
		Replicate value 1	12.1	20	0.152	0.569	3.6	7.94
		Replicate value 2	13.7	25.2	0.306	0.409	4.79	6.55
		Replicate value 3	7.96	23	0.222	0.438	4.77	7.02
		mean of replicates	11.2533	22.7333	0.226667	0.472	4.38667	7.17
		Mean value	16.9933		0.349333		5.77833
	1		①	②	①	②	①	②
		Replicate value 1	24	23.6	0.445	0.417	6.8	7.17
		Replicate value 2	21.5	23.9	0.353	0.397	6.07	6.95
		Replicate value 3	16.3	24	0.39	0.53	6.19	7.67
		mean of replicates	20.6	23.8333	0.396	0.448	6.35333	7.26333
		Mean value	22.2167		0.422		6.80833
	3		①	②	①	②	①	②
		Replicate value 1	15	27.7	0.366	0.481	5.96	7.29
		Replicate value 2	18.3	19.8	0.438	0.503	6.48	7.85
		Replicate value 3	16.1	24.4	0.497	0.407	7.11	7.11
		mean of replicates	16.4667	23.9667	0.433667	0.463667	6.51667	7.41667
		Mean value	20.2167		0.448667		6.96667
SM19-P	0		①	②	①	②	①	②
		Replicate value 1	8.53	19.7	0.496	0.22	7.43	4.46
		Replicate value 2	7.02	16.1	0.567	0.26	7.8	4.9
		Replicate value 3	8.89	17.9	0.566	0.231	7.7	4.64
		mean of replicates	8.14667	17.9	0.543	0.237	7.64333	4.66667
		Mean value	13.0233		0.39		6.155
	1		①	②	①	②	①	②
		Replicate value 1	24.2	16.8	0.535	0.39	7.45	7.16
		Replicate value 2	22.8	19.6	0.531	0.358	7.53	6.69
		Replicate value 3	27.3	17.1	0.407	0.428	6.72	7.08
		mean of replicates	24.7667	17.8333	0.491	0.392	7.23333	6.97667
		Mean value	21.3		0.4415		7.105
	3		①	②	①	②	①	②
		Replicate value 1	19.1	20.3	0.535	0.344	7.72	6.4
		Replicate value 2	21.7	28.3	0.501	0.384	7.4	6.58
		Replicate value 3	22.7	23.4	0.496	0.491	7.42	7.44
		mean of replicates	21.1667	24	0.510667	0.406333	7.51333	6.80667
		Mean value	22.5833		0.4585		7.16
SM19	0		①	②	①	②	①	②
		Replicate value 1	11.8	25.5	0.336	0.351	6.05	6.2
		Replicate value 2	16.5	23.6	0.474	0.452	7.26	7.09
		Replicate value 3	14.4	22.4	0.431	0.423	6.96	6.97
		mean of replicates	14.2333	23.8333	0.413667	0.408667	6.75667	6.75333
		Mean value	19.0333		0.411167		6.755
	1		①	②	①	②	①	②
		Replicate value 1	23.4	22.1	0.478	0.483	7.52	7.51
		Replicate value 2	21.1	22.5	0.586	0.486	8.2	7.56
		Replicate value 3	23.3	24.3	0.521	0.49	8.12	7.85
		mean of replicates	22.6	22.9667	0.528333	0.486333	7.94667	7.64
		Mean value	22.7833		0.507333		7.79333
	3		①	②	①	②	①	②
		Replicate value 1	17.16	18.25	0.331	0.51	5.4	7.02
		Replicate value 2	18.5	19.8	0.5	0.453	6.87	6.73
		Replicate value 3	20.32	18.46	0.493	0.516	6.8	7.33
		mean of replicates	18.66	18.8367	0.441333	0.493	6.35667	7.02667
		Mean value	18.7483		0.467167		6.69167

## Sheet: 5.25
			Pn		Gs		Tr
SM19-N	0		①	②	①	②	①	②
		Replicate value 1	10.5	10.1	0.16	0.178	4.4	5.67
		Replicate value 2	10.3	13.4	0.364	0.117	7.1	4.12
		Replicate value 3	8.09	10.5	0.312	0.0956	6.93	3.45
		mean of replicates	9.63	11.3333	0.278667	0.1302	6.14333	4.41333
		Mean value	10.4817		0.204433		5.27833
	1		①	②	①	②	①	②
		Replicate value 1	8.31	11.2	0.209	0.323	5.12	6.62
		Replicate value 2	11.7	12.11	0.191	0.239	4.75	6.55
		Replicate value 3	17.5	11.36	0.224	0.242	5.43	6.7
		mean of replicates	12.5033	11.5567	0.208	0.268	5.1	6.62333
		Mean value	12.03		0.238		5.86167
	3		①	②	①	②	①	②
		Replicate value 1	14	16.5	0.322	0.46	6.5	9.17
		Replicate value 2	7.43	16.9	0.126	0.449	3.63	9.01
		Replicate value 3	11.5	13.5	0.211	0.419	4.9	8.91
		mean of replicates	10.9767	15.6333	0.219667	0.442667	5.01	9.03
		Mean value	13.305		0.331167		7.02
SM19-P	0		①	②	①	②	①	②
		Replicate value 1	10.8	4.71	0.1685	0.286	2.43	6.26
		Replicate value 2	7.49	6.33	0.1698	0.181	3.22	4.4
		Replicate value 3	8.3	7.53	0.122	0.23	4.05	5.33
		mean of replicates	8.86333	6.19	0.153433	0.232333	3.23333	5.33
		Mean value	7.52667		0.192883		4.28167
	1		①	②	①	②	①	②
		Replicate value 1	6.99	11.5	0.304	0.154	6.94	4.18
		Replicate value 2	6.06	11.4	0.285	0.126	6.95	3.59
		Replicate value 3	11.7	11.45	0.355	0.102	7.9	2.92
		mean of replicates	8.25	11.45	0.314667	0.127333	7.26333	3.56333
		Mean value	9.85		0.221		5.41333
	3		①	②	①	②	①	②
		Replicate value 1	9.01	16.9	0.38	0.437	6.16	6.8
		Replicate value 2	13.2	10.1	0.312	0.398	6.21	6.54
		Replicate value 3	10.8	12.5	0.244	0.349	5.23	7.16
		mean of replicates	11.0033	13.1667	0.312	0.394667	5.86667	6.83333
		Mean value	12.085		0.353333		6.35
SM19	0		①	②	①	②	①	②
		Replicate value 1	7.43	14.7	0.347	0.174	7.26	4.76
		Replicate value 2	8.99	7.87	0.221	0.241	5.5	5.91
		Replicate value 3	10.3	12.7	0.392	0.21	7.57	5.34
		mean of replicates	8.90667	11.7567	0.32	0.208333	6.77667	5.33667
		Mean value	10.3317		0.264167		6.05667
	1		①	②	①	②	①	②
		Replicate value 1	15.51	17.72	0.41	0.126	7.28	4.14
		Replicate value 2	15.52	17.8	0.438	0.193	7.78	5.51
		Replicate value 3	14.85	16.8	0.42	0.233	7.53	6.55
		mean of replicates	15.515	17.44	0.422667	0.184	7.53	5.4
		Mean value	16.4775		0.303333		6.465
	3		①	②	①	②	①	②
		Replicate value 1	16.3	14.9	0.196	0.418	5.12	8.52
		Replicate value 2	11.7	11.5	0.217	0.236	5.45	6.02
		Replicate value 3	12.1	13.2	0.185	0.364	4.5	7.7
		mean of replicates	13.3667	13.2	0.199333	0.339333	5.02333	7.41333
		Mean value	13.2833		0.269333		6.21833
