# Supplementary material for: Dynamic effects of irrigation on photosynthesis and yield-related physiological characteristics in different glutinous wheat cultivars
Source: PeerJ. 2025 Oct 24;13:e20230. doi: 10.7717/peerj.20230 (PMC12558156; doi:10.7717/peerj.20230)
Supplement: Supplemental Information 4 [file peerj-13-20230-s004.xlsx]

## Sheet: SOD
SOD
			A560
SM19-N	0	①	0.147
		②	0.145
	1	①	0.146
		②	0.138
	3	①	0.127
		②	0.15
SM19-P	0	①	0.176
		②	0.141
	1	①	0.163
		②	0.152
	3	①	0.168
		②	0.137
SM19	0	①	0.179
		②	0.182
	1	①	0.148
		②	0.156
	3	①	0.182
		②	0.167

## Sheet: POD
POD（A470/min/g FW)
			0s	60s	120s	180s	A470结果
SM19-N	0	①	0.129	0.381	0.567	0.71	0.193667
		②	0.243	0.509	0.696	0.845	0.200667
	1	①	0.127	0.397	0.587	0.832	0.235
		②	0.159	0.491	0.712	0.871	0.237333
	3	①	0.176	0.494	0.724	0.912	0.245333
		②	0.111	0.473	0.73	0.828	0.239
SM19-P	0	①	0.167	0.253	0.491	0.662	0.165
		②	0.103	0.2	0.235	0.542	0.146333
	1	①	0.196	0.408	0.571	0.695	0.166333
		②	0.181	0.41	0.582	0.716	0.178333
	3	①	0.093	0.343	0.522	0.653	0.211
		②	0.168	0.43	0.653	0.813	0.215
SM19	0	①	0.227	0.494	0.674	0.72	0.164333
		②	0.228	0.476	0.684	0.721	0.164333
	1	①	0.142	0.358	0.555	0.756	0.204667
		②	0.14	0.382	0.609	0.795	0.218333
	3	①	0.075	0.309	0.449	0.634	0.193
		②	0.084	0.283	0.459	0.616	0.177333

## Sheet: CAT
CAT
			0S	60S	120S	180S
SM19-N	0		1.013	1	0.992	0.983
			1.112	1.087	1.087	1.082
	1		0.967	0.95	0.935	0.921
			0.97	0.953	0.936	0.923
	3		1.033	1.035	1.011	0.997
			1.029	1.004	0.983	0.965
SM19-P	0		1.032	1.029	1.023	0.987
			1.022	0.999	0.987	0.979
	1		1.137	1.119	1.097	1.08
			1.062	1.042	1.034	1.014
	3		0.993	0.992	0.956	0.927
			1.057	1.053	1.017	0.99
SM19	0		0.978	0.957	0.954	0.955
			1.032	1.022	1.015	1.013
	1		0.935	0.92	0.907	0.897
			0.963	0.947	0.935	0.922
	3		1.052	1.037	1.02	1.012
			1.043	1.023	1.017	1.009

## Sheet: MDA
MDA（umol/g*FW)
			A450	A532	A600
SM19-N	0	①	1.299	0.778	0.494
		②	1.296	0.854	0.487
	1	①	0.621	0.375	0.123
		②	0.521	0.316	0.121
	3	①	1.011	0.735	0.613
		②	0.988	0.581	0.232
SM19-P	0	①	0.972	0.574	0.229
		②	0.965	0.671	0.405
	1	①	0.782	0.418	0.152
		②	0.997	0.578	0.422
	3	①	0.62	0.268	0.212
		②	0.614	0.301	0.094
SM19	0	①	1.325	0.867	0.473
		②	1.427	0.792	0.576
	1	①	0.548	0.443	0.351
		②	0.591	0.465	0.379
	3	①	0.708	0.53	0.332
		②	0.815	0.589	0.392
