# Supplementary material for: Dynamic effects of irrigation on photosynthesis and yield-related physiological characteristics in different glutinous wheat cultivars
Source: PeerJ. 2025 Oct 24;13:e20230. doi: 10.7717/peerj.20230 (PMC12558156; doi:10.7717/peerj.20230)
Supplement: Supplemental Information 5 [file peerj-13-20230-s005.xlsx]

## Sheet: SOD
SOD
			A560
SM19-N	0	①	0.084
		②	0.069
		③	0.076
	1	①	0.025
		②	0.024
		③	0.012
	3	①	0.016
		②	0.013
		③	0.019
SM19-P	0	①	0.129
		②	0.075
		③	0.103
	1	①	0.073
		②	0.065
		③	0.054
	3	①	0.053
		②	0.062
		③	0.041
SM19	0	①	0.085
		②	0.073
		③	0.082
	1	①	0.089
		②	0.077
		③	0.068
	3	①	0.082
		②	0.067
		③	0.089

## Sheet: POD
POD（A470/min/g FW)
			0s	60s	120s	180s	A470结果
SM19-N	0	①	0.034	0.519	0.103	0.845	0.270333
		②	0.072	0.595	0.624	0.936	0.288
		③	0.017	0.325	0.732	0.841	0.274667
	1	①	0.026	0.353	0.415	0.742	0.238667
		②	0.039	0.497	0.454	0.804	0.255
		③	0.045	0.487	0.609	0.765	0.24
	3	①	0.011	0.324	0.607	0.88	0.289667
		②	0.017	0.327	0.41	0.71	0.231
		③	0.016	0.384	0.42	0.749	0.244333
SM19-P	0	①	0.013	0.32	0.509	0.495	0.160667
		②	0.011	0.444	0.422	0.667	0.218667
		③	0.017	0.44	0.546	0.628	0.203667
	1	①	0.203	0.304	0.539	0.912	0.236333
		②	0.203	0.308	0.37	0.854	0.217
		③	0.21	0.355	0.386	0.703	0.164333
	3	①	0.016	0.274	0.431	0.901	0.295
		②	0.015	0.323	0.333	0.799	0.261333
		③	0.013	0.325	0.407	0.892	0.293
SM19	0	①	0.048	0.393	0.423	0.603	0.185
		②	0.041	0.365	0.469	0.605	0.188
		③	0.096	0.331	0.431	0.608	0.170667
	1	①	0.047	0.257	0.332	0.681	0.211333
		②	0.046	0.37	0.457	0.72	0.224667
		③	0.049	0.36	0.443	0.711	0.220667
	3	①	0.001	0.305	0.36	0.553	0.184
		②	0.006	0.317	0.399	0.667	0.220333
		③	0.035	0.255	0.279	0.552	0.172333

## Sheet: CAT
CAT
			0s	60s	120s	180s
SM19-N	0	①	1.124	1.029	1.007	0.988
		②	1.194	1.086	1.023	1.121
		③	1.206	1.173	1.145	1.121
	1	①	1.035	0.986	0.954	0.921
		②	1.031	1.024	0.962	0.919
		③	1.116	1.085	1.055	1.002
	3	①	0.992	0.868	0.801	0.792
		②	1.024	0.987	0.943	0.897
		③	1.031	0.998	0.936	0.906
SM19-P	0	①	1.047	1.01	0.988	0.991
		②	1.049	0.972	0.909	0.87
		③	1.046	0.984	0.935	0.881
	1	①	0.878	0.853	0.806	0.767
		②	1.107	1.072	1.024	0.986
		③	1.001	0.845	0.782	0.764
	3	①	0.845	0.782	0.73	0.692
		②	1.075	1.001	0.954	0.91
		③	1.051	0.963	0.898	0.876
SM19	0	①	0.858	0.789	0.74	0.704
		②	1.017	0.983	0.93	0.891
		③	0.912	0.841	0.766	0.743
	1	①	1.078	0.911	0.876	0.849
		②	1.151	0.99	0.935	0.898
		③	1.073	0.954	0.899	0.863
	3	①	1.104	0.968	0.906	0.86
		②	1.018	0.91	0.852	0.812
		③	1.052	0.985	0.938	0.824

## Sheet: MDA
MDA（umol/g*FW)
			A450	A532	A600
SM19-N	0	①	1.822	1.209	0.795
		②	1.704	1.158	0.666
		③	1.748	1.167	0.822
	1	①	1.423	0.867	0.568
		②	1.478	0.868	0.576
		③	1.479	0.969	0.588
	3	①	1.245	1.105	0.921
		②	1.231	0.828	0.433
		③	1.135	0.678	0.425
SM19-P	0	①	0.711	0.535	0.271
		②	0.754	0.642	0.326
		③	0.649	0.508	0.218
	1	①	1.188	1.722	1.342
		②	1.189	1.662	1.341
		③	1.188	1.641	1.494
	3	①	1.633	0.618	0.351
		②	1.653	1.123	0.845
		③	1.642	1.088	0.821
SM19	0	①	1.063	0.645	0.348
		②	0.94	0.574	0.318
		③	0.857	0.607	0.304
	1	①	1.444	1.318	0.987
		②	1.381	0.869	0.547
		③	1.281	0.684	0.395
	3	①	0.987	0.507	0.208
		②	1.068	0.689	0.384
		③	0.922	0.631	0.371
