# Supplementary material for: Dynamic effects of irrigation on photosynthesis and yield-related physiological characteristics in different glutinous wheat cultivars
Source: PeerJ. 2025 Oct 24;13:e20230. doi: 10.7717/peerj.20230 (PMC12558156; doi:10.7717/peerj.20230)
Supplement: Supplemental Information 6 [file peerj-13-20230-s006.xlsx]

## Sheet: SOD
SOD
			A560
SM19-N	0	①	0.028
		②	0.024
		③	0.021
	1	①	0.014
		②	0.015
		③	0.016
	3	①	0.012
		②	0.014
		③	0.013
SM19-P	0	①	0.081
		②	0.091
		③	0.078
	1	①	0.036
		②	0.034
		③	0.037
	3	①	0.023
		②	0.02
		③	0.021
SM19	0	①	0.053
		②	0.051
		③	0.055
	1	①	0.037
		②	0.033
		③	0.029
	3	①	0.048
		②	0.044
		③	0.051

## Sheet: POD
POD（A470/min/g FW)
			0s	60s	120s	180s
SM19-N	0	①	0.161	0.444	0.677	0.898
		②	0.151	0.601	0.882	0.897
		③	0.171	0.46	0.681	0.894
	1	①	0.042	0.419	0.65	0.852
		②	0.076	0.33	0.522	0.838
		③	0.087	0.39	0.599	0.794
	3	①	0.136	0.437	0.688	0.921
		②	0.115	0.528	0.793	1.022
		③	0.137	0.398	0.62	0.932
SM19-P	0	①	0.125	0.504	0.8	0.717
		②	0.121	0.352	0.52	0.696
		③	0.083	0.322	0.514	0.689
	1	①	0.203	0.593	0.945	0.901
		②	0.107	0.388	0.617	0.808
		③	0.161	0.357	0.643	0.858
	3	①	0.128	0.436	0.693	0.925
		②	0.205	0.557	0.87	1.15
		③	0.118	0.354	0.556	0.987
SM19	0	①	0.133	0.505	0.794	0.794
		②	0.158	0.423	0.63	0.813
		③	0.153	0.427	0.662	0.819
	1	①	0.108	0.415	0.647	0.889
		②	0.104	0.359	0.556	0.894
		③	0.102	0.382	0.547	0.868
	3	①	0.052	0.476	0.782	0.743
		②	0.013	0.344	0.517	0.769
		③	0.0136	0.352	0.562	0.757

## Sheet: CAT
CAT
			0s	60s	120s	180s
SM19-N	0	①	0.127	0.124	0.12	0.103
		②	0.156	0.147	0.141	0.132
		③	0.163	0.158	0.156	0.137
	1	①	0.126	0.114	0.114	0.093
		②	0.198	0.186	0.182	0.161
		③	0.151	0.107	0.116	0.117
	3	①	0.156	0.138	0.132	0.112
		②	0.152	0.137	0.134	0.109
		③	0.125	0.112	0.106	0.081
SM19-P	0	①	0.159	0.143	0.138	0.133
		②	0.163	0.153	0.146	0.137
		③	0.069	0.068	0.065	0.043
	1	①	0.144	0.126	0.121	0.1
		②	0.166	0.14	0.152	0.125
		③	0.139	0.135	0.128	0.099
	3	①	0.093	0.079	0.082	0.052
		②	0.133	0.106	0.113	0.089
		③	0.145	0.112	0.109	0.102
SM19	0	①	0.115	0.109	0.103	0.1
		②	0.146	0.161	0.158	0.115
		③	0.119	0.103	0.103	0.108
	1	①	0.152	0.135	0.13	0.106
		②	0.15	0.144	0.14	0.108
		③	0.146	0.108	0.102	0.107
	3	①	0.153	0.155	0.142	0.112
		②	0.081	0.065	0.053	0.037
		③	0.157	0.153	0.146	0.114

## Sheet: MDA
MDA（umol/g*FW)
			A450	A532	A600
SM19-N	0	①	1.803	1.275	0.786
		②	1.789	1.341	0.755
		③	2.043	1.396	0.994
	1	①	1.724	1.284	0.789
		②	1.709	0.887	0.557
		③	1.847	1.252	0.838
	3	①	1.733	1.196	0.741
		②	1.79	1.185	0.756
		③	1.866	1.182	0.775
SM19-P	0	①	2.231	1.423	0.997
		②	2.166	1.373	0.884
		③	2.356	1.512	0.986
	1	①	1.966	1.273	0.779
		②	2.142	1.289	0.811
		③	1.8	1.108	0.786
	3	①	1.866	0.842	0.572
		②	1.855	1.131	0.673
		③	1.876	1.133	0.741
SM19	0	①	2.171	1.307	0.884
		②	2.191	1.376	0.862
		③	2.187	1.355	0.944
	1	①	0.797	0.553	0.246
		②	0.796	0.553	0.245
		③	0.818	0.481	0.238
	3	①	1.917	1.108	0.718
		②	1.911	1.156	0.687
		③	1.912	1.032	0.645
