# Supplementary material for: Dynamic effects of irrigation on photosynthesis and yield-related physiological characteristics in different glutinous wheat cultivars
Source: PeerJ. 2025 Oct 24;13:e20230. doi: 10.7717/peerj.20230 (PMC12558156; doi:10.7717/peerj.20230)
Supplement: Supplemental Information 7 [file peerj-13-20230-s007.xlsx]

## Sheet: SOD
SOD
			A560
SM19-N	0	①	0.064
		②	0.083
		③	0.062
	1	①	0.02
		②	0.021
		③	0.021
	3	①	0.091
		②	0.087
		③	0.092
SM19-P	0	①	0.029
		②	0.032
		③	0.033
	1	①	0.022
		②	0.024
		③	0.024
	3	①	0.057
		②	0.047
		③	0.048
SM19	0	①	0.13
		②	0.144
		③	0.151
	1	①	0.017
		②	0.016
		③	0.013
	3	①	0.093
		②	0.097
		③	0.08

## Sheet: POD
POD（A470/min/g FW)
			0s	60s	120s	180s
SM19-N	0	①	0.442	0.468	0.652	0.678
		②	0.368	0.405	0.672	0.676
		③	0.412	0.455	0.686	0.681
	1	①	0.456	0.547	0.832	0.845
		②	0.422	0.355	0.558	0.662
		③	0.419	0.489	0.692	0.863
	3	①	0.325	0.466	0.742	0.795
		②	0.329	0.432	0.692	0.781
		③	0.313	0.4	0.61	0.661
SM19-P	0	①	0.327	0.384	0.608	0.703
		②	0.298	0.317	0.526	0.57
		③	0.298	0.338	0.526	0.574
	1	①	0.369	0.383	0.595	0.627
		②	0.126	0.148	0.33	0.4
		③	0.317	0.346	0.573	0.598
	3	①	0.382	0.409	0.534	0.567
		②	0.443	0.46	0.75	0.776
		③	0.447	0.453	0.722	0.746
SM19	0	①	0.343	0.351	0.577	0.613
		②	0.315	0.321	0.496	0.535
		③	0.278	0.311	0.495	0.549
	1	①	0.257	0.397	0.566	0.632
		②	0.266	0.332	0.521	0.676
		③	0.422	0.677	0.487	0.634
	3	①	0.361	0.396	0.626	0.714
		②	0.358	0.377	0.57	0.653
		③	0.472	0.536	0.673	0.764

## Sheet: CAT
CAT
			0s	60s	120s	180s
SM19-N	0	①	0.262	0.253	0.254	0.246
		②	0.273	0.263	0.26	0.256
		③	0.268	0.259	0.257	0.251
	1	①	0.121	0.11	0.107	0.102
		②	0.123	0.138	0.131	0.101
		③	0.125	0.124	0.118	0.104
	3	①	0.122	0.1	0.093	0.09
		②	0.079	0.063	0.058	0.055
		③	0.121	0.113	0.098	0.096
SM19-P	0	①	0.079	0.069	0.069	0.055
		②	0.097	0.081	0.074	0.07
		③	0.082	0.073	0.063	0.056
	1	①	0.087	0.099	0.085	0.054
		②	0.09	0.072	0.06	0.054
		③	0.116	0.11	0.097	0.082
	3	①	0.078	0.053	0.04	0.033
		②	0.093	0.074	0.061	0.056
		③	0.094	0.08	0.068	0.053
SM19	0	①	0.066	0.061	0.054	0.05
		②	0.054	0.057	0.05	0.047
		③	0.063	0.059	0.05	0.053
	1	①	0.077	0.045	0.048	0.048
		②	0.079	0.086	0.079	0.05
		③	0.064	0.061	0.049	0.036
	3	①	0.065	0.044	0.029	0.042
		②	0.068	0.061	0.047	0.044
		③	0.064	0.064	0.046	0.042

## Sheet: MDA
MDA（umol/g*FW)
			A450	A532	A600
SM19-N	0	①	1.516	1.164	0.633
		②	1.065	0.798	0.338
		③	1.219	0.573	0.086
	1	①	0.712	0.655	0.279
		②	0.607	0.502	0.144
		③	0.731	0.545	0.16
	3	①	0.7	0.45	0.101
		②	0.691	0.465	0.107
		③	0.751	0.544	0.163
SM19-P	0	①	0.762	0.634	0.161
		②	0.787	0.699	0.226
		③	0.765	0.657	0.185
	1	①	0.63	0.543	0.126
		②	0.842	0.587	0.179
		③	0.745	0.455	0.04
	3	①	1.595	1.111	0.62
		②	1.411	0.599	0.125
		③	1.263	0.9	0.429
SM19	0	①	0.645	0.454	0.022
		②	0.642	0.443	0.089
		③	0.622	0.537	0.276
	1	①	0.503	0.373	0.076
		②	0.447	0.308	0.033
		③	0.486	0.455	0.159
	3	①	0.546	0.307	0.002
		②	0.589	0.555	0.244
		③	0.605	0.463	0.113
