# Supplementary material for: Dynamic effects of irrigation on photosynthesis and yield-related physiological characteristics in different glutinous wheat cultivars
Source: PeerJ. 2025 Oct 24;13:e20230. doi: 10.7717/peerj.20230 (PMC12558156; doi:10.7717/peerj.20230)
Supplement: Supplemental Information 8 [file peerj-13-20230-s008.xlsx]

## Sheet: AGPase
AGPase
	SM19-N			SM19-P			SM19
DATE	0	1	3	0	1	3	0	1	3
5.6	0.09	0.083	0.07	0.086	0.087	0.112	0.089	0.082	0.103
5.13	0.113	0.106	0.096	0.136	0.108	0.113	0.099	0.082	0.113
5.2	0.125	0.134	0.111	0.145	0.153	0.117	0.116	0.115	0.118
5.27	0.112	0.106	0.103	0.134	0.118	0.099	0.144	0.134	0.124
6.3	0.087	0.099	0.086	0.07	0.077	0.084	0.075	0.094	0.115

## Sheet: GBSS
GBSS
	SM19-P			SM19
DATE	0	1	3	0	1	3
5.6	0.403	0.363	0.341	0.371	0.29	0.346
5.13	0.434	0.376	0.376	0.416	0.323	0.361
5.2	0.462	0.447	0.409	0.449	0.439	1.075
5.27	0.421	0.449	0.496	0.396	0.42	0.533
6.3	0.381	0.418	0.476	0.362	0.359	0.439

## Sheet: SBE
SBE
	SM19-N			SM19-P			SM19
DATE	0	1	3	0	1	3	0	1	3
5.6	0.303	0.274	0.278	0.321	0.371	0.318	0.296	0.294	0.281
5.13	0.337	0.329	0.31	0.292	0.294	0.31	0.302	0.301	0.3
5.2	0.348	0.354	0.319	0.296	0.033	0.317	0.321	0.371	0.348
5.27	0.316	0.306	0.311	0.302	0.314	0.299	0.292	0.314	0.318
6.3	0.282	0.299	0.297	0.276	0.301	0.318	0.276	0.133	0.274

## Sheet: SSS
SSS
	SM19-N			SM19-P			SM19
DATE	0	1	3	0	1	3	0	1	3
5.6	0.58	0.49	0.679	0.49	0.425	0.567	0.58	0.258	0.198
5.13	0.286	0.317	0.218	0.282	0.306	0.286	0.286	0.3	0.218
5.2	0.303	0.257	0.251	0.251	0.222	0.216	0.303	0.49	0.679
5.27	0.278	0.258	0.243	0.351	0.321	0.262	0.278	0.317	0.251
6.3	0.275	0.3	0.198	0.296	0.297	0.246	0.275	0.257	0.243
