# Supplementary material for: Dynamic effects of irrigation on photosynthesis and yield-related physiological characteristics in different glutinous wheat cultivars
Source: PeerJ. 2025 Oct 24;13:e20230. doi: 10.7717/peerj.20230 (PMC12558156; doi:10.7717/peerj.20230)
Supplement: Supplemental Information 9 — The raw data shows the changes in photosynthetic activity, antioxidant enzyme activity, amylase activities, yield, and climate of three wheat varieties under three irrigation patterns. [file peerj-13-20230-s009.xlsx]

## Sheet: Sheet1
2022-2023 Wheat Growing Season Weather Data
Month	Precipitation(mm)	Rainy Days	Sunny Days	Average Temperature(℃)				Comparison with Long-Term Climatic Norms
2022-11-01	18.3	6	14	5.6				Indicator	2022-2023	Long-Term Average	Difference
2022-12-01	5.1	3	19	-1.2				Total Precipitation	180.6 mm	212 mm	15% Below
2023-01-01	8.7	4	17	-2.8				Key Period Precipitation
2023-02-01	12.9	5	13	4.1				Winter Dormancy (Dec-Feb)	26.7 mm	52 mm	49% Below
2023-03-01	24.8	7	11	10.3				Jointing Stage (Apr)	36.5 mm	28 mm	30% Above
2023-04-01	36.5	8	10	16.7				Grain Filling Stage (May)	45.2 mm	42 mm	7% Above
2023-05-01	45.2	6	12	22.9
2023-06-01	29.1	3	17	26.4
